# Supplementary material for: Combined Inhibition of the TGF-β1/Smad Pathway by <em>Prevotella copri</em> And <em>Lactobacillus murinus</em> to Reduce Inflammation And Fibrosis in Primary Sclerosing Cholangitis
Source: Preprints.org preprint supplement (doi:10.20944/preprints202305.1707.v1), 2023-05-24
Supplement: Supplementary file 1 [file supplementary]

**Supplement**

**Fig.S1** Identification of *Prevotella copri* (*P. copri*) and *Lactobacillus murinus* (*L. murinus*).


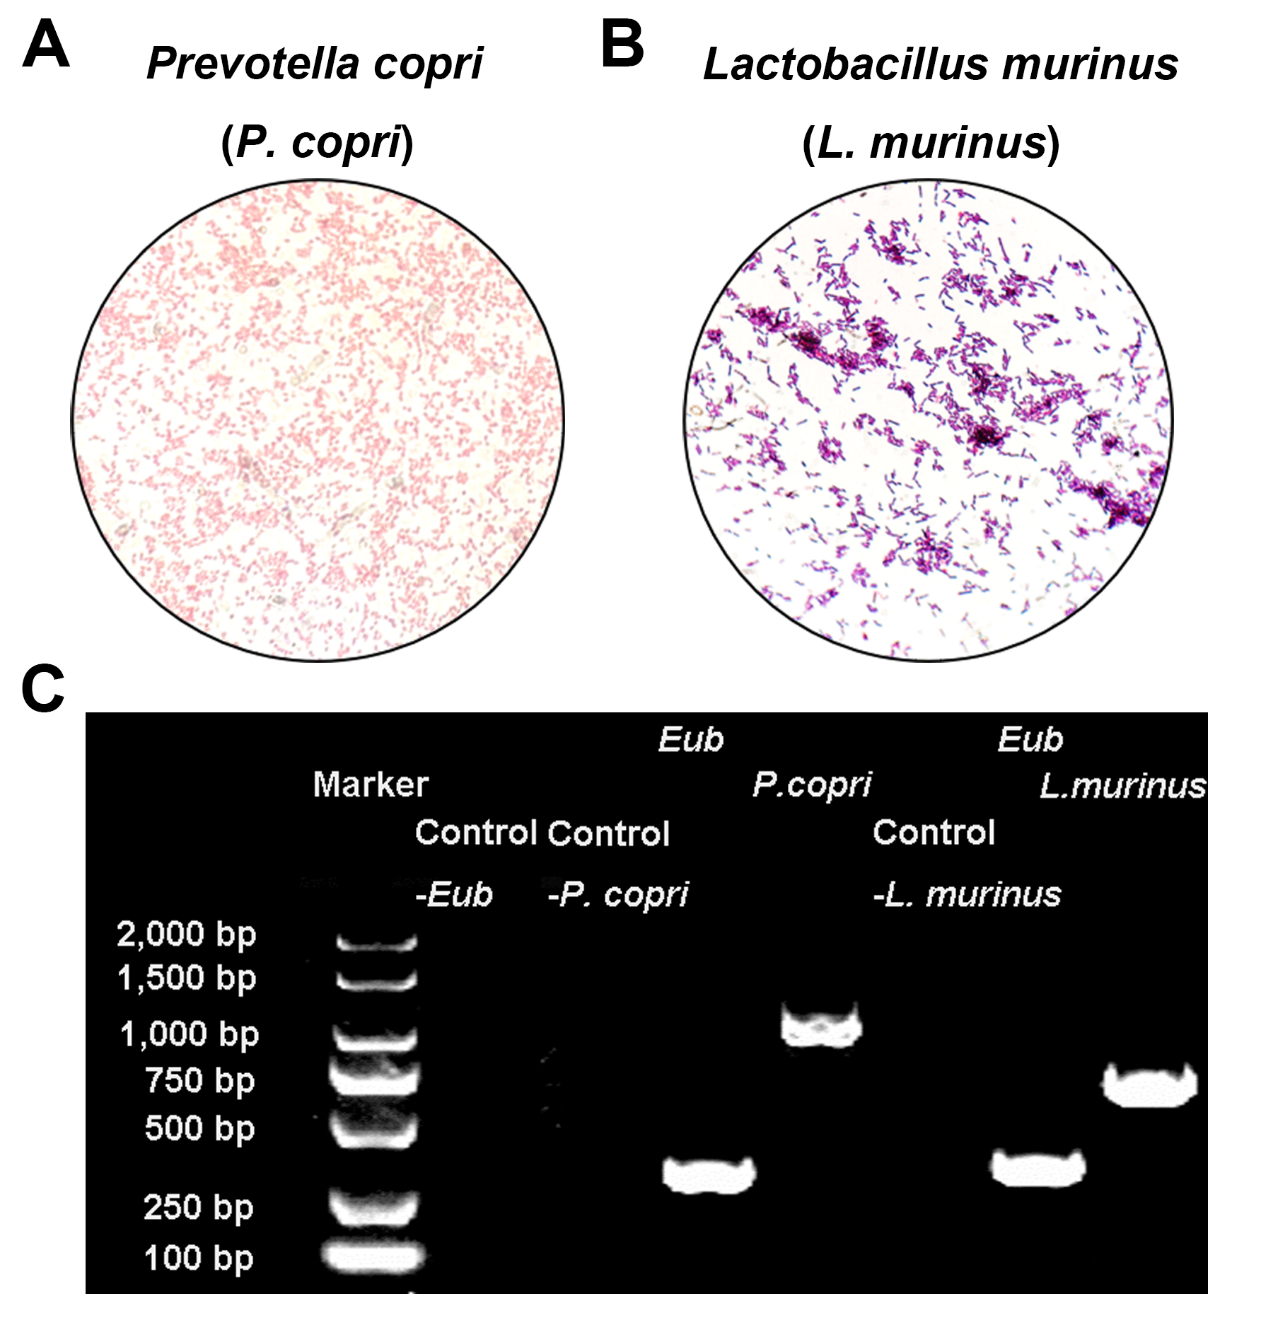


The *P. copri* and *L. murinus* were validated by two methods. (A) Under oil microscope, *P. copri* was gram-negative and *L. murinus* was gram-positive. (B) The specific primers of *P. copri*, *L. murinus* and the universal primers EUB were used for PCR verification, and the bands were visible by 2% agarose gel electrophoresis.
